# Supplementary material
Source: PubMed Central journal article supplement (PMC9850817)
Supplement: NIHMS1851776-supplement-Supplementary_material.pdf [file NIHMS1851776-supplement-Supplementary_material.pdf]

## **Supplemental table and figure legends**

**Table S1 Diets composition used in this study (related to Diet section of STAR Methods)**

**Figure S1 (related to fig 1&2). Impact of maternal lactation diet on intestine.**

**Figure S2 (related to fig 3&4). Impact of maternal lactation diet on offspring DIO proneness was alleviated by antibiotics or co-housing.**

**Figure S3 (related to fig 5). Impact of maternal lactation diet on 12-week-old offspring.**

**Figure S4 (related to fig 5). Food restriction largely normalized DIO severity in offspring of fiber deprived dams.**

**Figure S5 (related to fig 6). Enrichment of maternal diet with inulin ameliorated low graded inflammation in offspring.**

**Fig S6 (related to fig 7). Enrichment of maternal diet with inulin reduced offspring proneness to DIO.**

Table S1. Diets composition used in this study.

| Product #                | LabDiet 5001 |        | D12450J |       | D13081108 |       | D12492 |       |
|--------------------------|--------------|--------|---------|-------|-----------|-------|--------|-------|
|                          | GBC          |        | LF-LFD  |       | IE-LFD    |       | LF-HFD |       |
|                          | gm%          | kcal%  | gm%     | kcal% | gm%       | kcal% | gm%    | kcal% |
| Protein                  | 24.1         | 28.672 | 19      | 20    | 18        | 20    | 26     | 20    |
| Carbohydrate             | 48.7         | 57.9   | 67      | 70    | 74        | 70    | 26     | 20    |
| Fat                      | 5            | 13.384 | 4       | 10    | 4         | 10    | 35     | 60    |
| Fiber                    | 15-25        |        | 5       |       | 20        |       | 5      |       |
| Total                    |              | 100    |         | 100   |           | 100   |        | 100   |
| kcal/gm                  | 3.36         |        | 3.8     |       | 3.5       |       | 5.2    |       |
|                          |              |        |         |       |           |       |        |       |
| <b>Ingredient</b>        |              |        | gm      | kcal  | gm        | kcal  | gm     | kcal  |
| Casein                   |              |        | 200     | 800   | 200       | 800   | 200    | 800   |
| L-Cystine                |              |        | 3       | 12    | 3         | 12    | 3      | 12    |
|                          |              |        |         |       |           |       |        |       |
| Corn Starch              |              |        | 506.2   | 2025  | 456.2     | 1825  | 0      | 0     |
| Maltodextrin 10          |              |        | 125     | 500   | 125       | 500   | 125    | 500   |
| Sucrose                  |              |        | 68.8    | 275   | 68.8      | 275   | 68.8   | 275   |
|                          |              |        |         |       |           |       |        |       |
| Cellulose, BW200         |              |        | 50      | 0     | 0         | 0     | 50     | 0     |
| Inulin                   |              |        | 0       | 0     | 200       | 200   | 0      | 0     |
|                          |              |        |         |       |           |       |        |       |
| Soybean Oil              |              |        | 25      | 225   | 25        | 225   | 25     | 225   |
| Lard                     |              |        | 20      | 180   | 20        | 180   | 245    | 2205  |
|                          |              |        |         |       |           |       |        |       |
| Mineral Mix, S10026      |              |        | 10      | 0     | 10        | 0     | 10     | 0     |
| DiCalcium Phosphate      |              |        | 13      | 0     | 13        | 0     | 13     | 0     |
| Calcium Carbonate        |              |        | 5.5     | 0     | 5.5       | 0     | 5.5    | 0     |
| Potassium Citrate, 1 H2O |              |        | 16.5    | 0     | 16.5      | 0     | 16.5   | 0     |
|                          |              |        |         |       |           |       |        |       |
| Vitamin Mix, V10001      |              |        | 10      | 40    | 10        | 40    | 10     | 40    |
| Choline Bitartrate       |              |        | 2       | 0     | 2         | 0     | 2      | 0     |
|                          |              |        |         |       |           |       |        |       |
| FD&C Yellow Dye #5       |              |        | 0.04    | 0     | 0.025     | 0     | 0      | 0     |
| FD&C Red Dye #40         |              |        | 0       | 0     | 0         | 0     | 0      | 0     |
| FD&C Blue Dye #1         |              |        | 0.01    | 0     | 0.025     | 0     | 0.05   | 0     |
| <b>Total</b>             |              |        | 1055.1  | 4057  | 1155.1    | 4057  | 773.85 | 4057  |

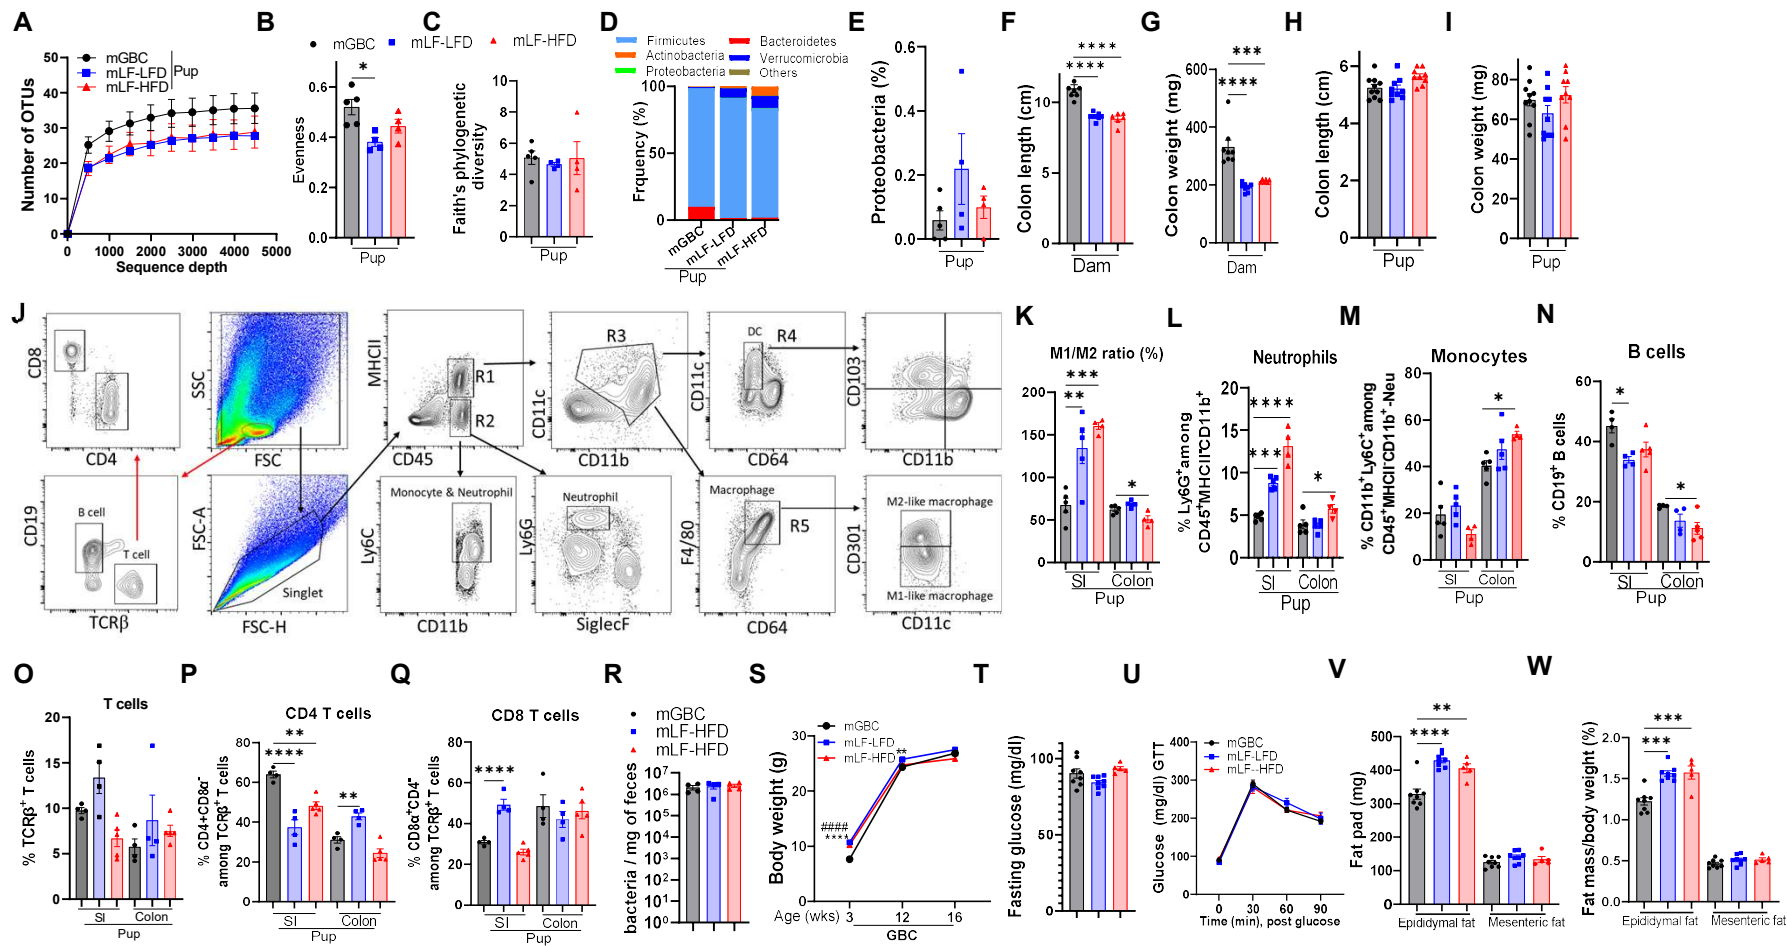

**Figure S1 (related to fig 1&2). Impact of maternal lactation diet on intestine.**

(A-E). Ileal microbiota composition of pups via 16S rRNA gene sequencing. Observed OTUs (A), Pielou's evenness (B), Faith's phylogenetic diversity (C); Overall relative phylogenetic abundance (D), and percent Proteobacteria (E).

(F-I) Colon length and weights of indicated dams (F&G) and their 3-week-old female offspring (H&I).

(J-Q) Lamina propria cells from small intestine and colon were analyzed by FACS as gated in (J). M1 and M2 macrophage, neutrophils, monocytes, B and T cells in small intestine (SI) and colon were quantitated (K-Q).

(R) qPCR measure of bacteria per mg feces of 12-week-old offspring mice.

(S-W) Metabolic measurements in 3-week-old male offspring weaned onto GBC. Body weight was monitored (S). At 16 weeks of age, overnight fasting glucose (T) and glucose tolerance (U) was measured. Epididymal, mesenteric fat including absolute value (V) and in relation to body weight (W) were measured after euthanasia. One-way ANOVA: \* $p < 0.05$ ; \*\* $p < 0.01$ ; \*\*\* $p < 0.001$ ;

\*\*\*\* $p < 0.0001$ ; ##### $p < 0.0001$ . In S, \*indicated mLF-LFD vs mGBC; # indicated mLF-HFD vs mGBC.

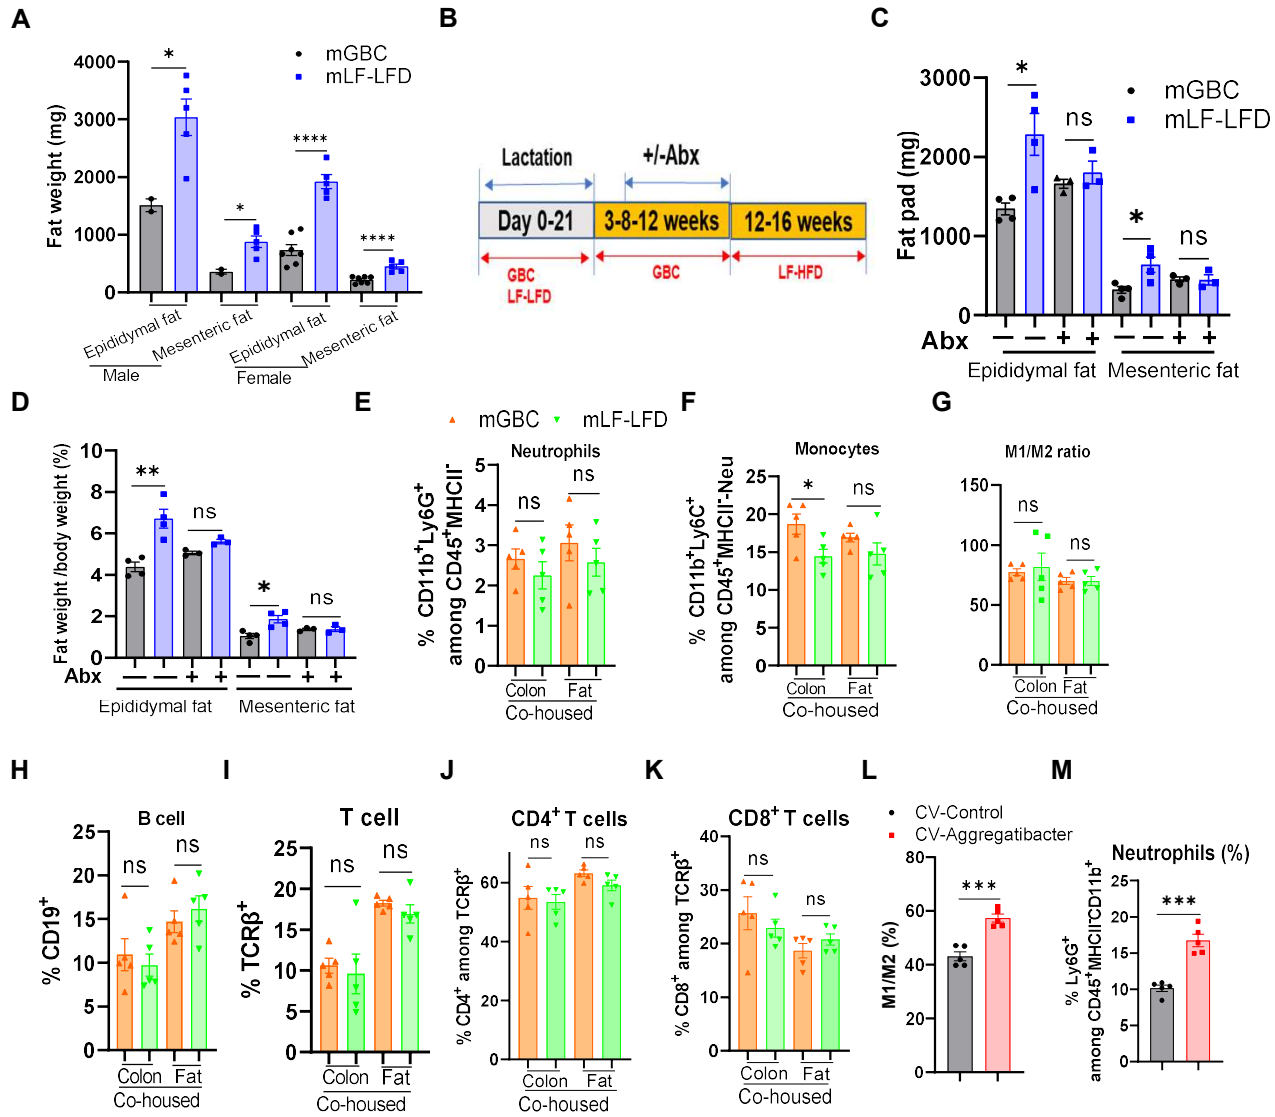

**Figure S2 (related to fig 3&4). Impact of maternal lactation diet on offspring DIO proneness was alleviated by antibiotics or co-housing.**

**(A)** Two dams nursing 9-10 mice in one cage were fed indicated diets during lactation. Offspring were weaned at 3 weeks of age onto GBC then, at 12 weeks of age, fed LF-HFD. Epididymal and mesenteric fat mass at the end of experiment.

**(B-D)** Scheme: Some offspring were subjected to microbiota ablation via administration of drinking water containing broad-spectrum antibiotics starting 8 weeks of age and ending before initiation of LF-HFD feeding at 12 weeks of age (B). Epididymal and mesenteric fat mass, gross (C) and calculated as percentage of body weight (D).

**(E-K)** FACS analysis of colons and epididymal adipose tissue from co-housed offspring mice following a 4-week course of LF-HFD consumption.

**(L&M)** FACS analysis of colon following 4 weeks of *Aggregatibacter* strain administration. Student's t test: \* $p < 0.05$ ; \*\* $p < 0.01$ ; \*\*\* $p < 0.001$ ; \*\*\*\* $p < 0.0001$ , ns, not significant.

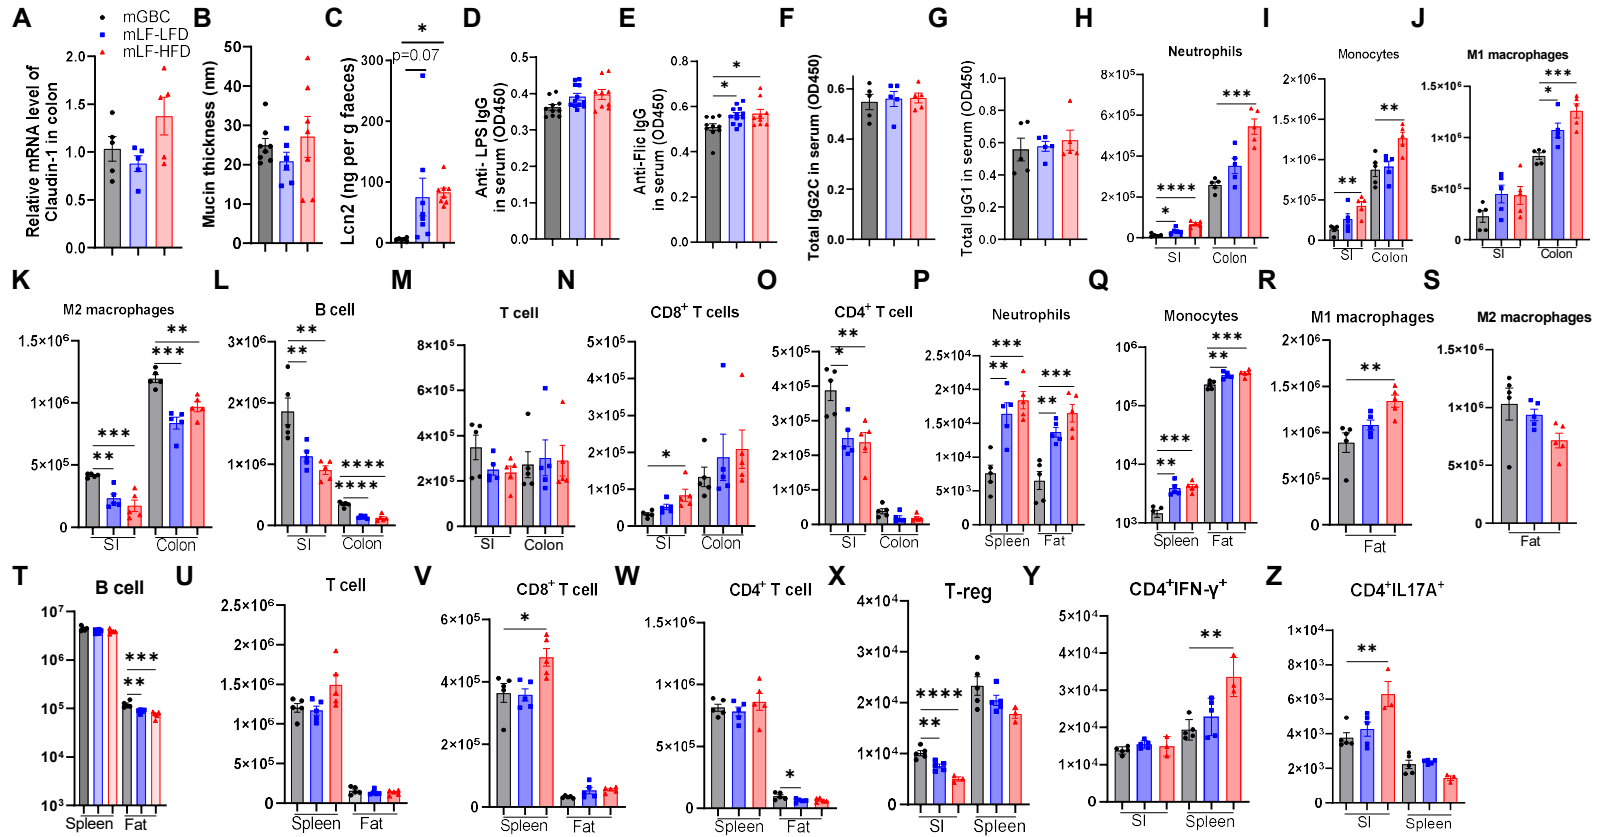

**Figure S3 (related to fig 5). Impact of maternal lactation diet on 12-week-old offspring.**

**(A)** Colon claudin-1 expression via qRT-PCR.

**(B)** Colon mucus thickness.

**(C)** Fecal Lcn2.

**(D&E)** Serum anti-LPS (D) and anti-flagellin (E).

**(F&G)** Total serum IgG2C (F) and IgG1 (G).

**(H-Z)** Quantitation of neutrophils (Neu), monocytes, M1/M2 macrophage, B and T lymphocytes including T-cell subset in small intestine (SI), colon, spleen or epididymal fat by FACS analysis. The number of different immune cells population was showed.

One-way ANOVA: \* $p < 0.05$ ; \*\* $p < 0.01$ ; \*\*\* $p < 0.001$ ; \*\*\*\* $p < 0.0001$ .



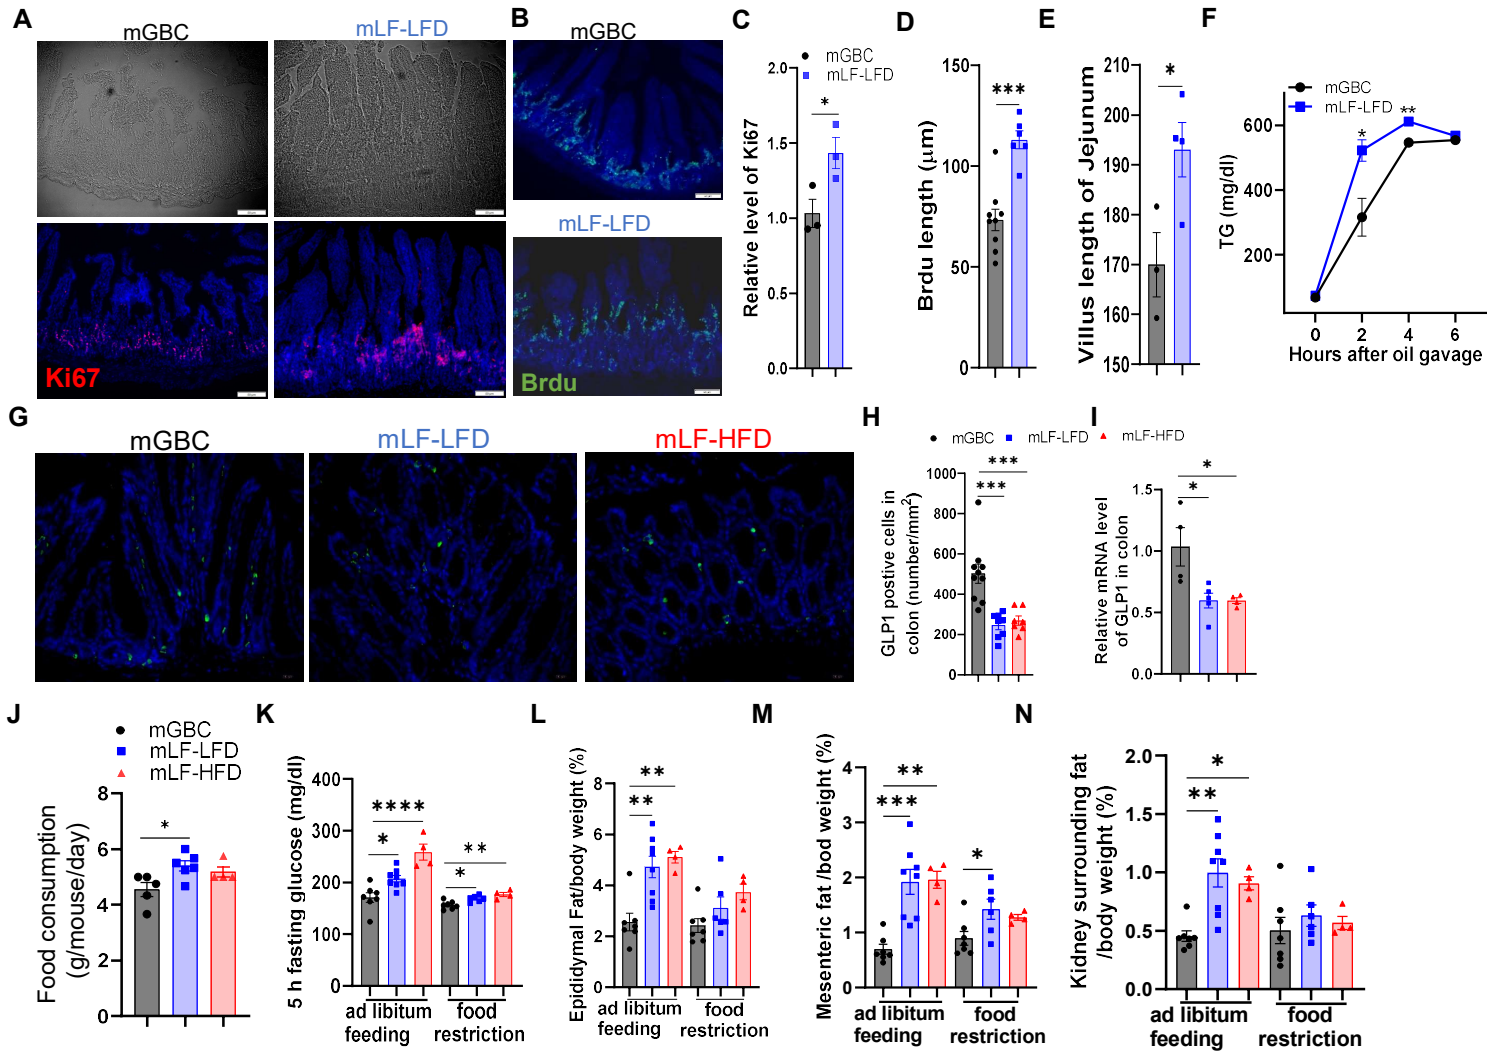

**Figure S4 (related to fig 5). Food restriction largely normalized DIO severity in offspring of fiber deprived dams.**

**A-J**, 12-week-old GBC-fed offspring of dams fed indicating lactating diet(m) were assayed.

**(A-C)** Measure of enterocyte proliferation/migration in 12-week-old offspring, Ki67 staining (A&C), Brdu labeling (B&D) and jejunal villus length (E).

**(F)** Fat absorption as indicated by levels of serum TG following injection of tyloxapol and orally gavaged with olive oil

**(G-H)** Colonic GLP<sup>+</sup> L cells quantitated by immunofluorescence microscopy.

**(I)** Colonic epithelial GLP1 expression by qRT-PCR.

**(J)** Offspring mice fed with GBC at 12 weeks of age were measured for food consumption.

**(K-N)** 12-week-old offspring of mice fed indicating lactating diet(m) were administer LF-HFD fed ad libitum or restricted (2.8g/per day) for 10 days at which time indicated parameters were measured. Student's t test (C, D, E, F). One-way ANOVA

(H, I, J, K, L, M, N). \*p < 0.05; \*\*p < 0.01; \*\*\*p < 0.001; \*\*\*\*p < 0.0001.

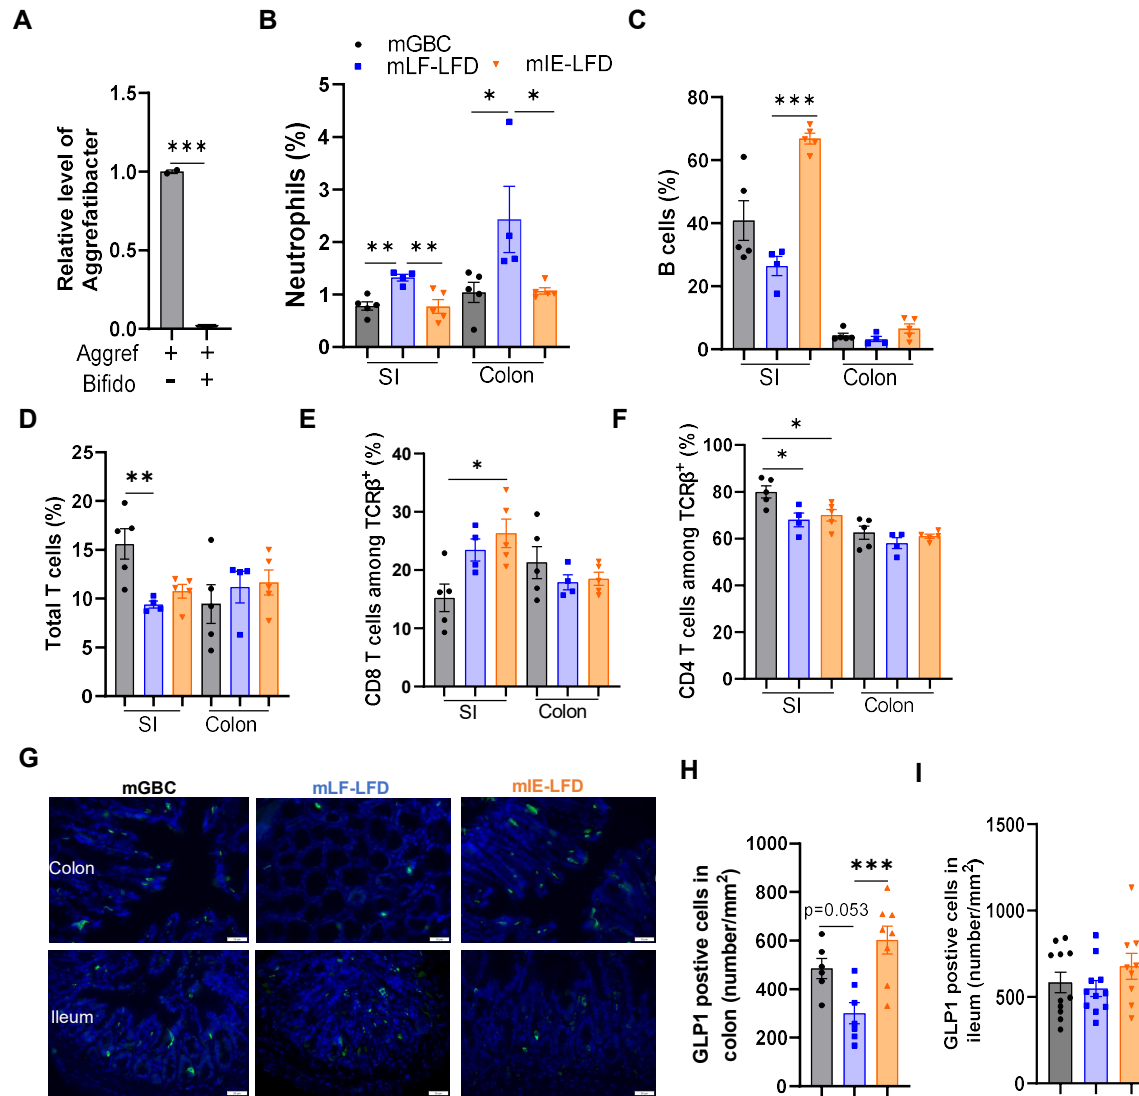

**Figure S5 (related to fig 6). Enrichment of maternal diet with inulin ameliorated low graded inflammation in offspring.**

**(A)** qPCR-based measure *Aggregatibacter* (*Aggregref*) growth in vitro with or without *Bifidobacterium* (*Bifido*).

**(B-F)** FACS analysis of immune cells in 12-week-old GBC-fed offspring of mice fed indicating lactating diet(m).

**(G-I)** GLP<sup>+</sup> L cells were assayed by immunofluorescence microscopy. Representative images (G) and quantitation of cells in colon (H) and small intestine (I). One-way ANOVA except A using student's t test: \*p < 0.05; \*\*p < 0.01; \*\*\*p < 0.001.

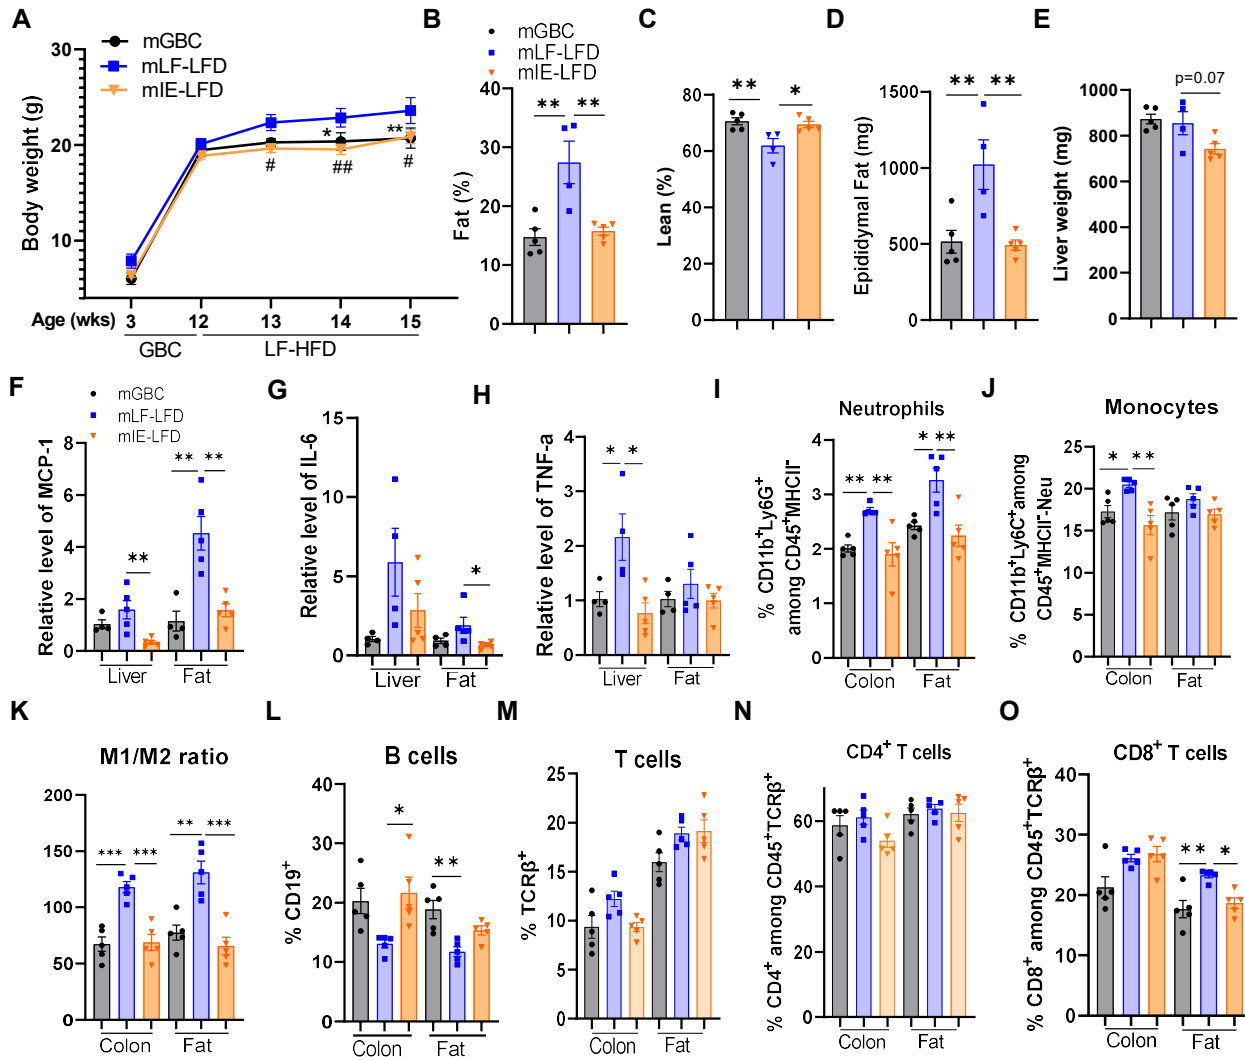

**Fig S6 (related to fig 7). Enrichment of maternal diet with inulin reduced offspring proneness to DIO.**

(A-E) Female offspring of dams fed indicating lactating diet(m) were weaned onto GBC and, at 12 weeks of age, administered LF-HFD for 4 weeks. Body weight over time (A). Whole-body fat and lean mass at 15 weeks of age via MRI (B-C). Post-euthanasia measure of epididymal adipose (D) and liver weight (E).

(F-O) Male offspring with sequentially GBC and LF-HFD feeding as described above. Euthanized and tissues harvested for cytokine expression analysis via qRT-PCR (F-H), quantitation of neutrophils (Neu), monocytes, M1/M2 macrophage, B and T lymphocytes in colon and epididymal fat pad by FACS (I-O). One-way ANOVA: \*p < 0.05; \*\*p < 0.01; \*\*\*p < 0.001. In A, #indicated mLF-LFD vs mIE-LFD.
